# Supplementary material for: Photocatalytic Degradation of Single and Binary Mixture of Brilliant Green and Rhodamine B Dyes by Zinc Sulfide Quantum Dots
Source: MDPI journal article supplement (doi:10.3390/molecules26247686), 2021-12-19
Supplement: s1 [file s1]

# Photocatalytic degradation of single and binary mixture of brilliant green and rhodamine B dyes by zinc sulphide quantum dots

Peter A. Ajibade\* and Abimbola E. Oluwalana

*School of Chemistry and Physics, University of KwaZulu-Natal, Private Bag, Scottsville, Pietermaritzburg 3209, South Africa*

## Supplementary Information

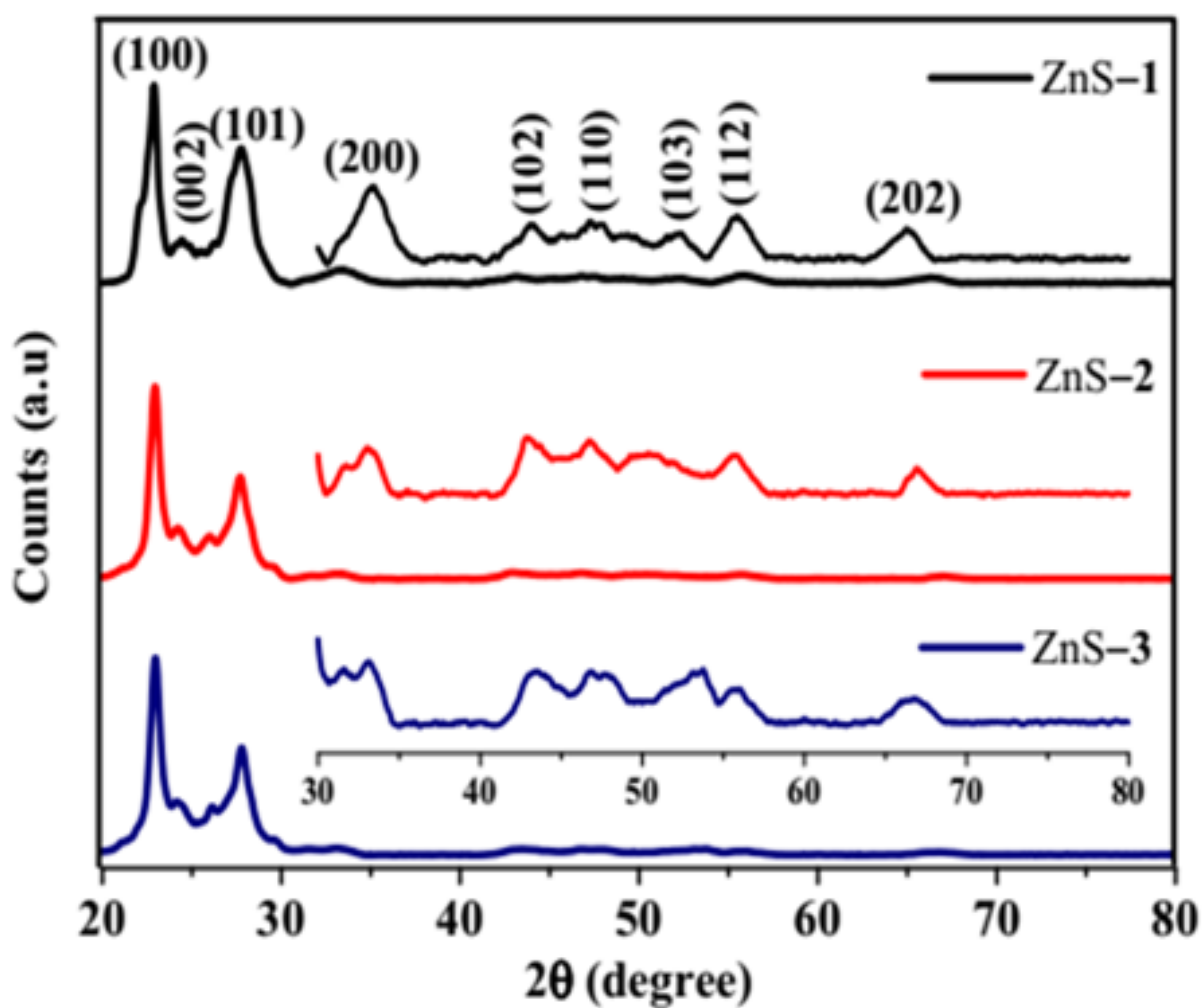

**Figure S1:** Powder X-ray diffraction patterns of ZnS quantum dots prepared at 30 min (ZnS-1), 1 h (ZnS-2) and 2 h (ZnS-3)

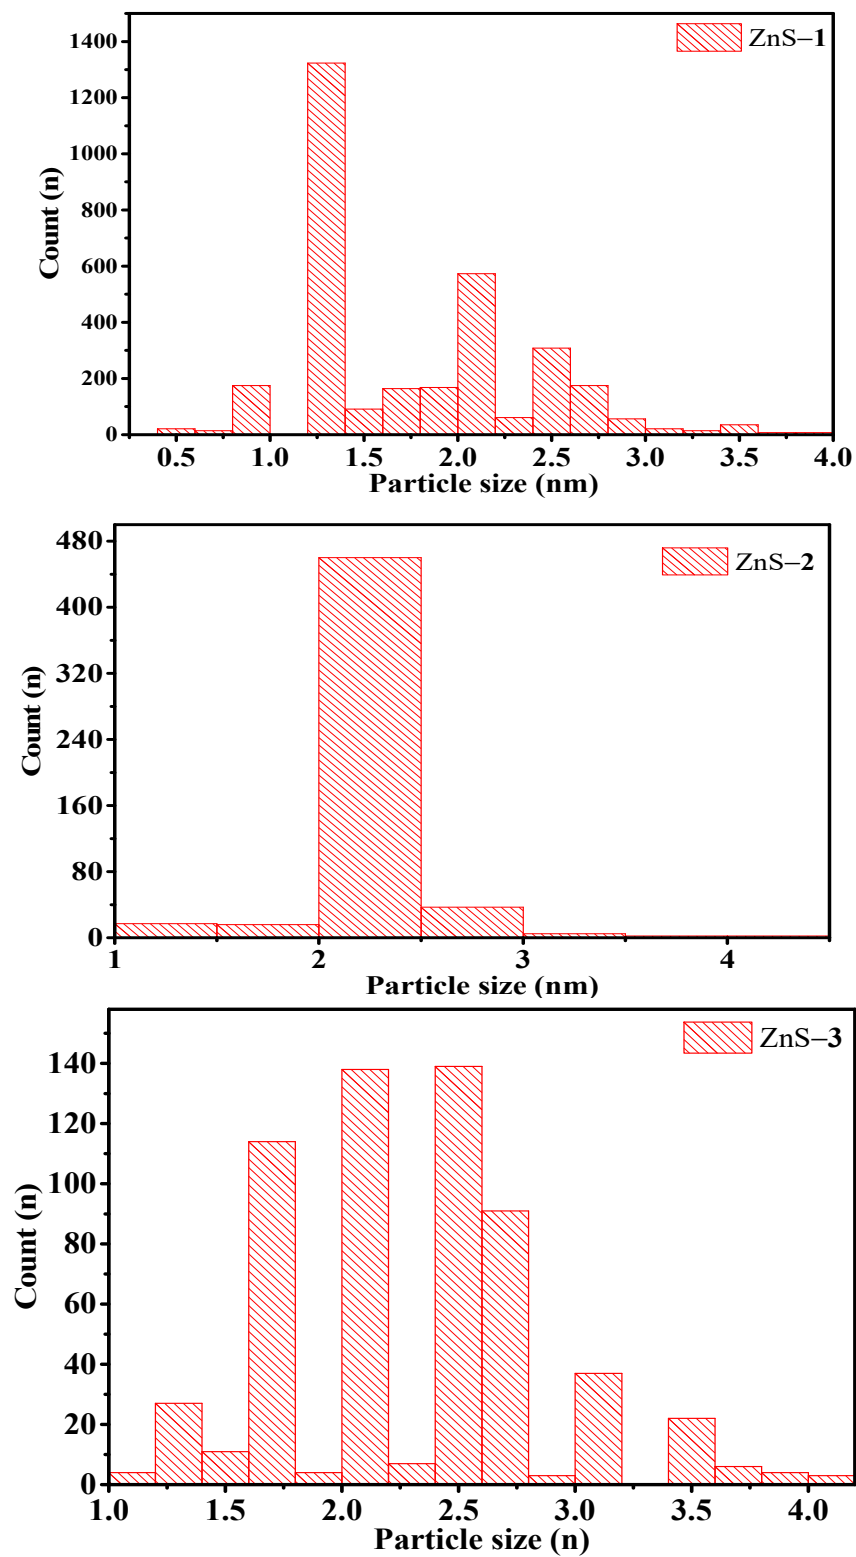

Figure S2: Particle size distributions of the ZnS nanoparticles

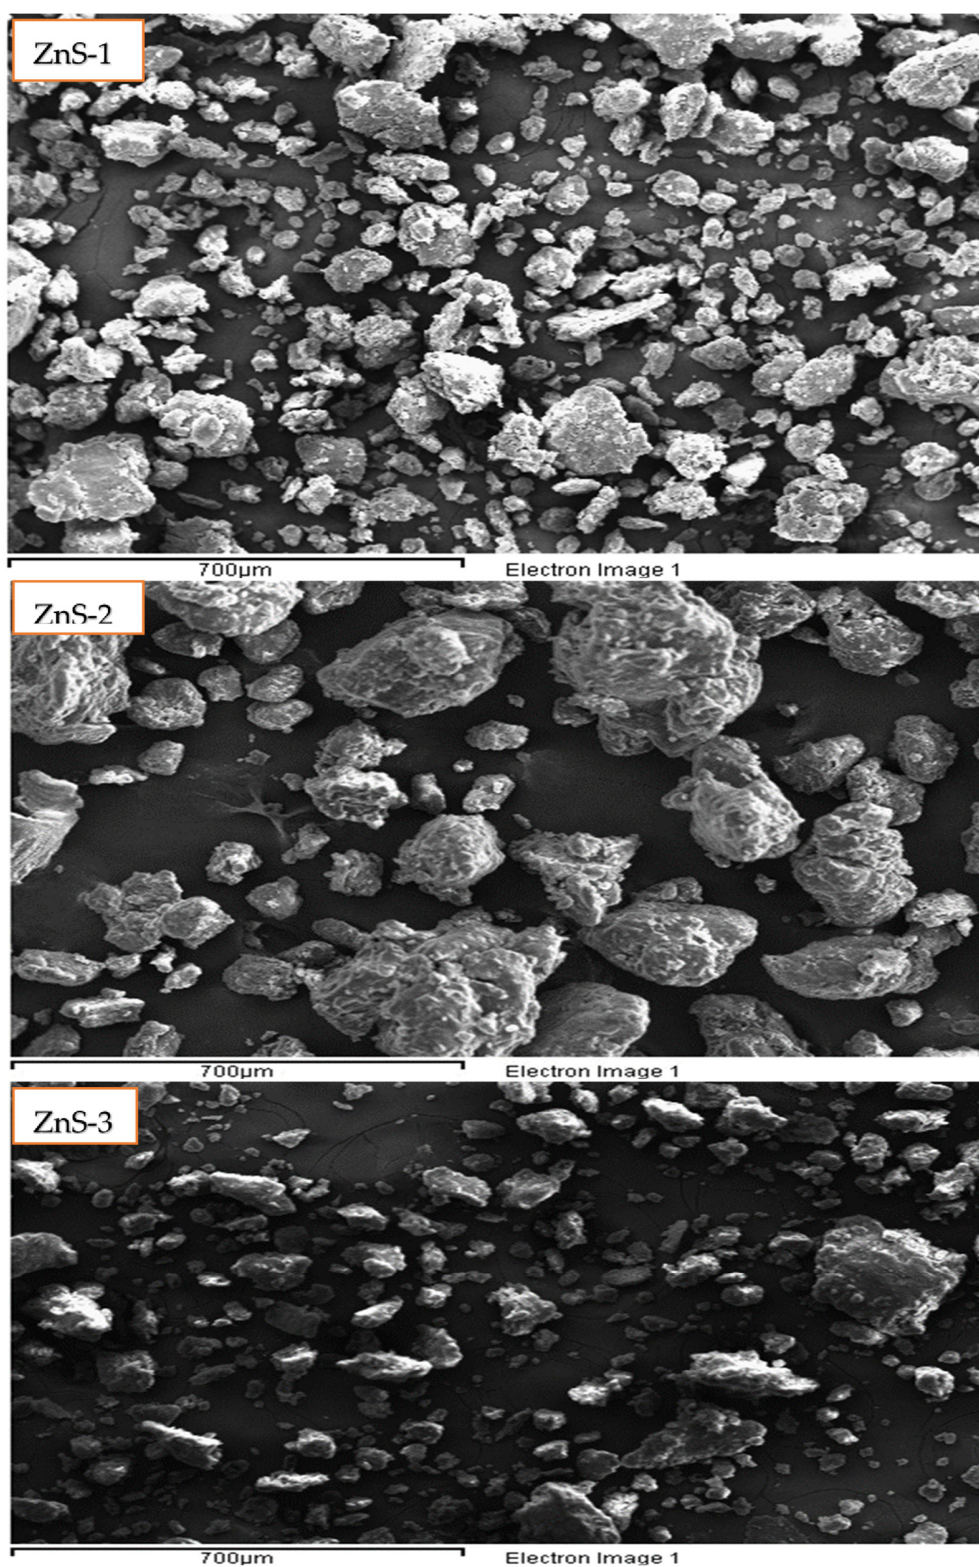

Figure S3: SEM images of the ZnS quantum dots

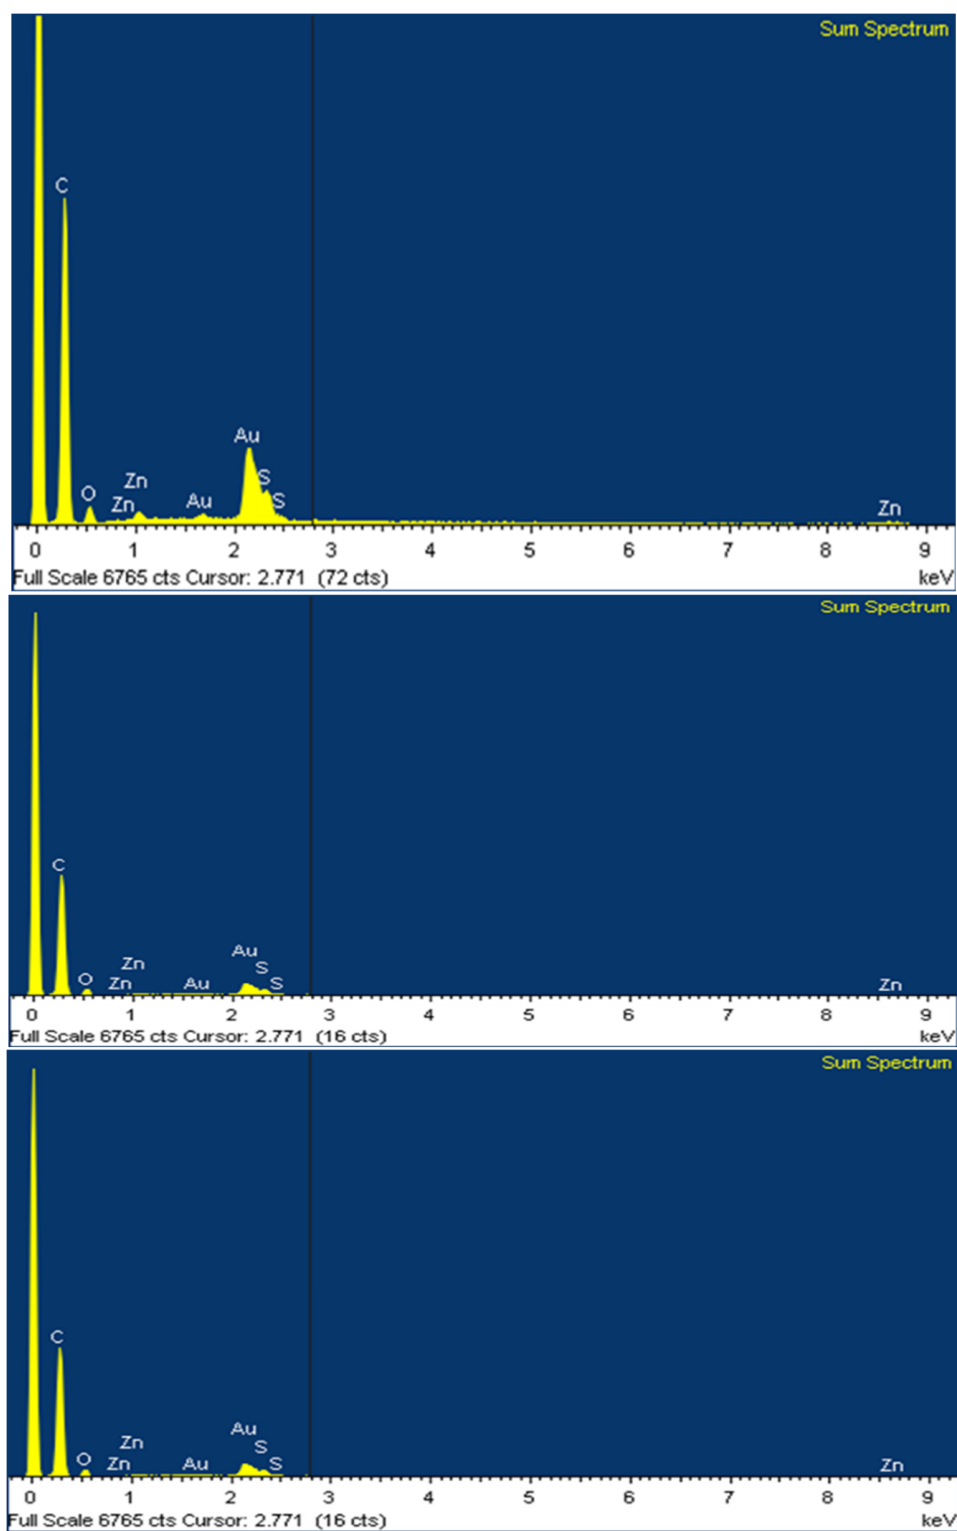

**Figure S4:** EDX spectra of the ZnS quantum dots

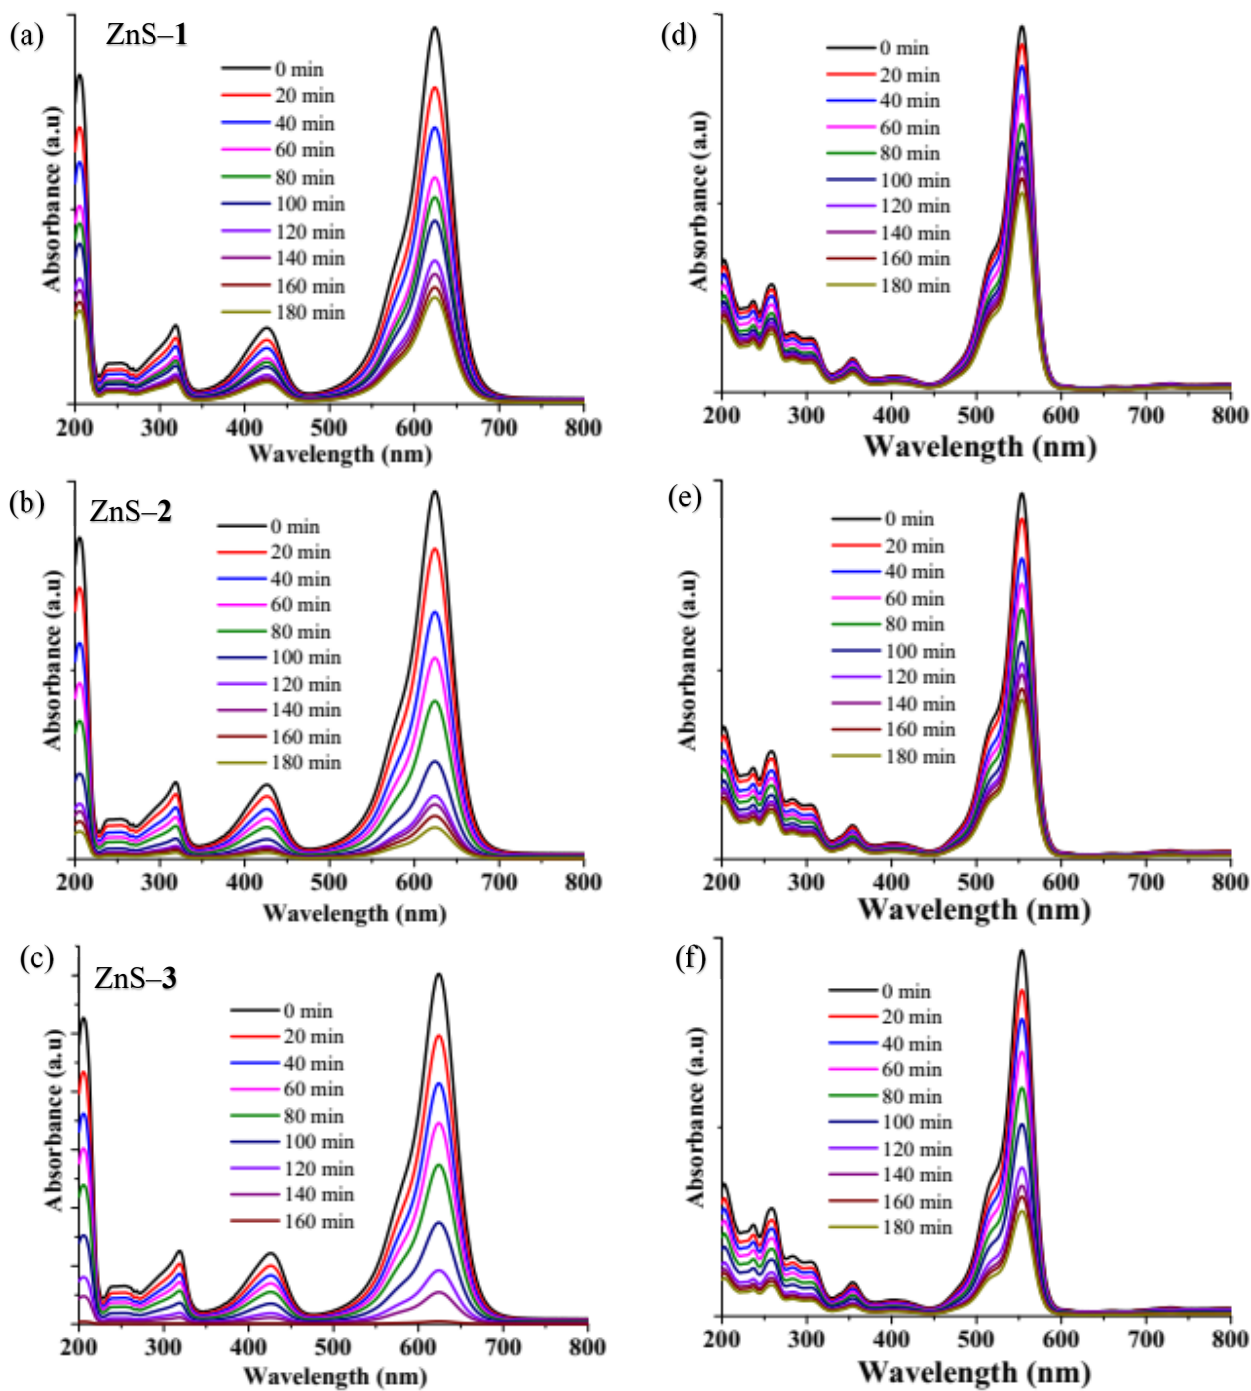

Figure S5: Absorption spectra of brilliant green (a-c) and rhodamine B (d-f) over ZnS quantum dots



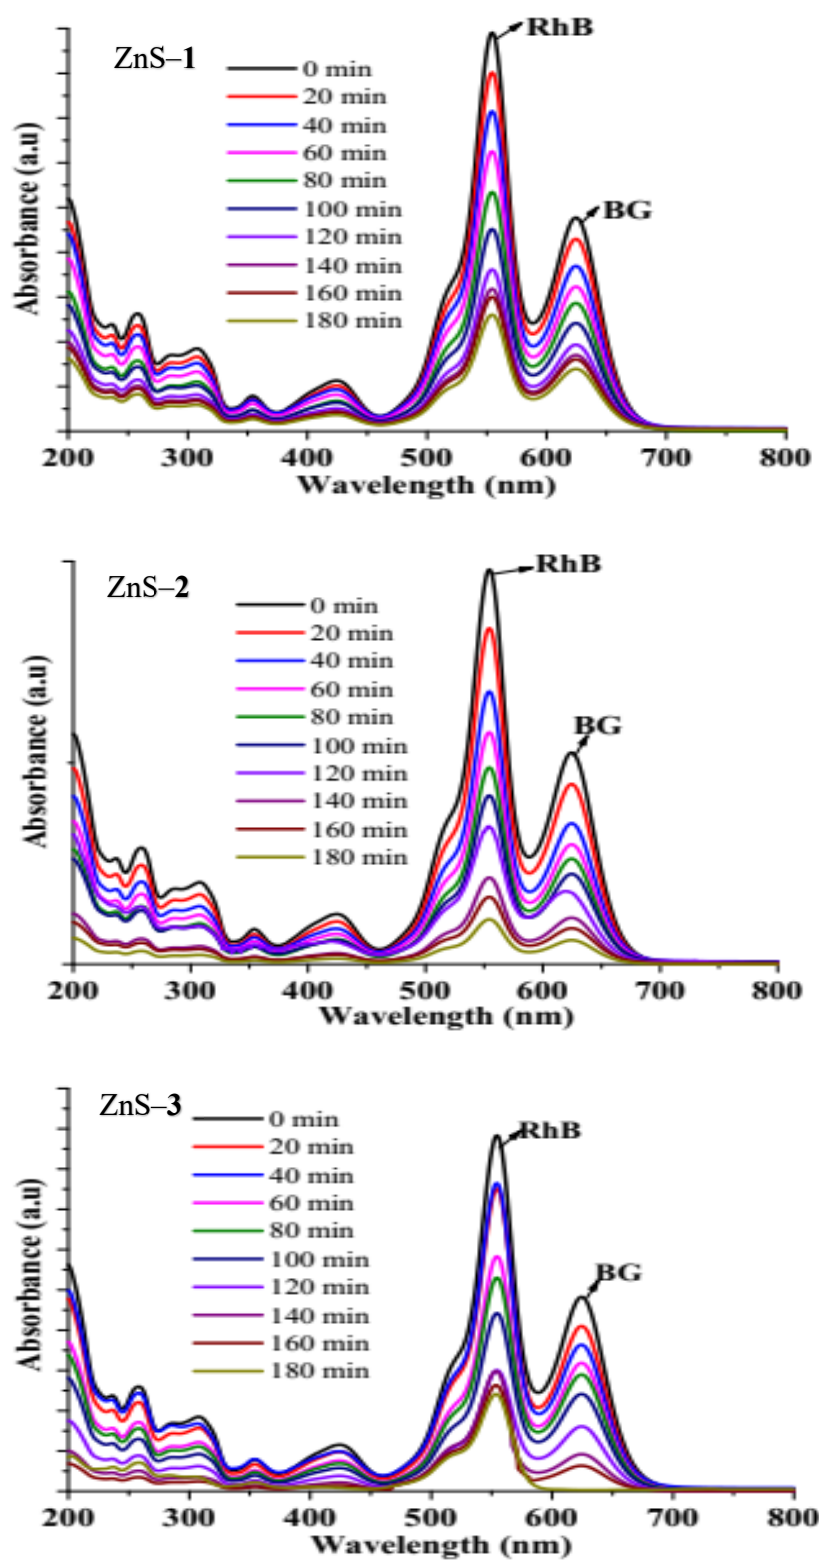

**Figure S6:** Absorption spectra of BG–RhB degradation over ZnS quantum dots
